# Supplementary material for: COS-7 and SVGp12 Cellular Models to Study JCPyV Replication and MicroRNA Expression after Infection with Archetypal and Rearranged-NCCR Viral Strains
Source: MDPI journal article supplement (doi:10.3390/v14092070), 2022-09-17
Supplement: s1 [file s1]

**Table S1.** JCPyV replication at different time points in the CY and MAD-1-infected COS-7 and SVGp12 cell lines

| archetype CY-infected cells |  | JCPyV average value copies-cell/days post-infection (d.p.i.)  |          |          |          |          |          |
|-----------------------------|--|---------------------------------------------------------------|----------|----------|----------|----------|----------|
|                             |  | 3                                                             | 7        | 14       | 21       | 28       | 35       |
| COS-7                       |  | 2,00E+03                                                      | 9,00E+03 | 1,00E+04 | 7,00E+04 | 5,00E+05 | 8,00E+05 |
| SVGp12                      |  | 9,00E+02                                                      | 2,00E+03 | 9,00E+03 | 5,00E+04 | 1,00E+05 | 5,00E+05 |
| MAD-1-infected cells        |  | JCPyV average value copies-cell/ days post-infection (d.p.i.) |          |          |          |          |          |
|                             |  | 3                                                             | 7        | 14       | 21       | 28       | 35       |
| COS-7                       |  | 1,00E+04                                                      | 8,50E+04 | 6,00E+05 | 9,00E+06 | 7,00E+07 | 9,00E+08 |
| SVGp12                      |  | 9,00E+04                                                      | 3,00E+05 | 7,50E+05 | 6,00E+06 | 8,50E+07 | 8,50E+08 |

**Table S1bis (based on data from Table S1).** Fold-increase of the JCPyV copy number starting three days after infection in the CY and MAD-1-infected COS-7 and SVGp12 cell lines

| CY strain    |          |          |          |          |            |             |
|--------------|----------|----------|----------|----------|------------|-------------|
|              | 3        | 7        | 14       | 21       | 28         | 35          |
| COS cells    | set as 1 | 4.5-fold | 5-fold   | 35-fold  | 250-fold   | 400-fold    |
| SVG12p       | set as 1 | 2.2-fold | 10-fold  | 56-fold  | 111-fold   | 556-fold    |
| MAD-1 strain |          |          |          |          |            |             |
| COS cells    | set as 1 | 8.5-fold | 60-fold  | 900-fold | 7,000-fold | 90,000-fold |
| SVG12p       | set as 1 | 3.3-fold | 8.3-fold | 67-fold  | 944-fold   | 9,444-fold  |

**Table S2.** miR-J1-5p expression at different time points in the CY and MAD-1-infected COS-7 and SVGp12 cell lines

| archetype CY-infected cells |  | JCPyV average value (copies-ng)/days post-infection (d.p.i.) |     |     |     |     |     |
|-----------------------------|--|--------------------------------------------------------------|-----|-----|-----|-----|-----|
|                             |  | 3                                                            | 7   | 14  | 21  | 28  | 35  |
| COS-7                       |  | 900                                                          | 800 | 700 | 650 | 600 | 540 |
| SVGp12                      |  | 950                                                          | 900 | 850 | 700 | 650 | 600 |
| MAD-1-infected cells        |  | JCPyV average value (copies-ng)/days post-infection (d.p.i.) |     |     |     |     |     |
|                             |  | 3                                                            | 7   | 14  | 21  | 28  | 35  |
| COS-7                       |  | 850                                                          | 780 | 550 | 500 | 350 | 250 |
| SVGp12                      |  | 800                                                          | 550 | 500 | 400 | 320 | 200 |

**Table S2bis (based on data from Table S2).** Percent decrease (%-age decrease) of miR-J1-5p expression at different time points in the CY and MAD-1-infected COS-7 and SVGp12 cell lines

| CY strain    |             |     |     |     |     |     |
|--------------|-------------|-----|-----|-----|-----|-----|
|              | 3           | 7   | 14  | 21  | 28  | 35  |
| COS-7        | set as 100% | 11% | 22% | 28% | 33% | 40% |
| SVG12p       | set as 100% | 5%  | 11% | 26% | 32% | 37% |
| MAD-1 strain |             |     |     |     |     |     |
| COS cells    | set as 100% | 8%  | 35% | 41% | 59% | 71% |
| SVG12p       | set as 100% | 31% | 37% | 50% | 60% | 75% |

**Table S3.** miR-J1-5p expression at different time points in the exosomes after COS-7 and SVGp12 cells-infection with CY and MAD-1 strains

| archetype CY-infected cells | JCPyV average value copies-ng/days post-infection (d.p.i.) |     |     |     |     |     |
|-----------------------------|------------------------------------------------------------|-----|-----|-----|-----|-----|
|                             | 3                                                          | 7   | 14  | 21  | 28  | 35  |
| COS-7                       | 500                                                        | 500 | 400 | 300 | 300 | 250 |
| SVGp12                      | 550                                                        | 500 | 400 | 350 | 300 | 300 |
| MAD-1-infected cells        | JCPyV average value copies-ng/days post-infection (d.p.i.) |     |     |     |     |     |
|                             | 3                                                          | 7   | 14  | 21  | 28  | 35  |
| COS-7                       | 350                                                        | 350 | 300 | 300 | 250 | 200 |
| SVGp12                      | 300                                                        | 300 | 280 | 250 | 230 | 150 |

**Table S3bis (based on data from Table 3):** Percent decrease (%-age decrease) of miR-J1-5p expression at different time points in the exosomes after COS-7 and SVGp12 cells-infection with CY and MAD-1 strains

| CY strain    |             |    |     |     |     |     |
|--------------|-------------|----|-----|-----|-----|-----|
|              | 3           | 7  | 14  | 21  | 28  | 35  |
| COS-7        | set as 100% | 0% | 20% | 40% | 40% | 50% |
| SVG12p       | set as 100% | 9% | 27% | 36% | 45% | 45% |
| MAD-1 strain |             |    |     |     |     |     |
| COS cells    | set as 100% | 0% | 14% | 14% | 29% | 43% |
| SVG12p       | set as 100% | 0% | 7%  | 17% | 23% | 50% |

**Table S4.** JCPyV replication post-infection addition of JCPyV miRNA-containing exosomes to uninfected cell lines COS-7 and SVGp12 cell lines

| archetype CY-infected cells |          | JCPyV average value (copies-cell)/ days post-infection (d.p.i.) |          |          |          |          |
|-----------------------------|----------|-----------------------------------------------------------------|----------|----------|----------|----------|
|                             | 3        | 7                                                               | 14       | 21       | 28       | 35       |
| COS-7                       | 8,00E+02 | 1,00E+03                                                        | 5,00E+03 | 8,00E+03 | 4,00E+04 | 9,00E+04 |
| SVGp12                      | 1,00E+02 | 7,50E+02                                                        | 1,00E+03 | 9,50E+03 | 7,00E+04 | 1,00E+05 |

| MAD-1-infected cells |          | JCPyV average value (copies-cell)/ days post-infection (d.p.i.) |          |          |          |          |
|----------------------|----------|-----------------------------------------------------------------|----------|----------|----------|----------|
|                      | 3        | 7                                                               | 14       | 21       | 28       | 35       |
| COS-7                | 7,00E+02 | 9,00E+02                                                        | 3,00E+03 | 6,00E+03 | 1,00E+04 | 5,00E+04 |
| SVGp12               | 1,00E+02 | 5,50E+02                                                        | 9,00E+02 | 5,50E+03 | 5,00E+03 | 9,00E+04 |

**Table S4bis (based on data from Table 4).** Fold increase of JCPyV replication post-infection addition of JCPyV miRNA-containing exosomes to uninfected cell lines COS-7 and SVGp12 cell lines

| CY strain |          |   |          |          |         |          |           |
|-----------|----------|---|----------|----------|---------|----------|-----------|
|           |          | 3 | 7        | 14       | 21      | 28       | 35        |
| COS-7     | set as 1 |   | 1.3-fold | 6.3-fold | 10-fold | 50-fold  | 113-fold  |
| SVG12p    | set as 1 |   | 7.5-fold | 10-fold  | 95-fold | 700-fold | 1000-fold |

  

| MAD-1 strain |          |  |          |          |          |         |          |
|--------------|----------|--|----------|----------|----------|---------|----------|
| COS cells    | set as 1 |  | 1.3-fold | 4.3-fold | 8.6-fold | 14-fold | 71-fold  |
| SVG12p       | set as 1 |  | 5.5-fold | 9-fold   | 55-fold  | 50-fold | 900-fold |
